# Supplementary material for: Pure graphene oxide doped conducting polymer nanocomposite for bio-interfacing
Source: Royal Society of Chemistry journal article supplement (doi:10.1039/c3tb00006k), 2013-01-01
Supplement: c3tb00006k.pdf [file c3tb00006k.pdf]

## Pure Graphene Oxide Doped Conducting Polymer Nanocomposite for Bio-interfacing

*Xiliang Luo<sup>a,§</sup>, Cassandra L. Weaver<sup>b,c,§</sup>, Susheng Tan<sup>d</sup> and Xinyan Tracy Cui<sup>b,c,e,\*</sup>*

<sup>a</sup> Key Laboratory of Biochemical Analysis, Ministry of Education, College of Chemistry and Molecular Engineering, Qingdao University of Science and Technology, Qingdao 266042, China

<sup>b</sup> Department of Bioengineering, University of Pittsburgh, Pittsburgh, PA 15260, USA

<sup>c</sup> Center for the Neural Basis of Cognition, University of Pittsburgh, Pittsburgh, PA 15260, USA

<sup>d</sup> Petersen Institute of Nanoscience and Engineering, University of Pittsburgh, Pittsburgh, PA 15260, USA

<sup>e</sup> McGowan Institute for Regenerative Medicine, University of Pittsburgh, Pittsburgh, PA 15260, USA

§ Authors contributed equally to this manuscript

### Electronic Supplementary Figures

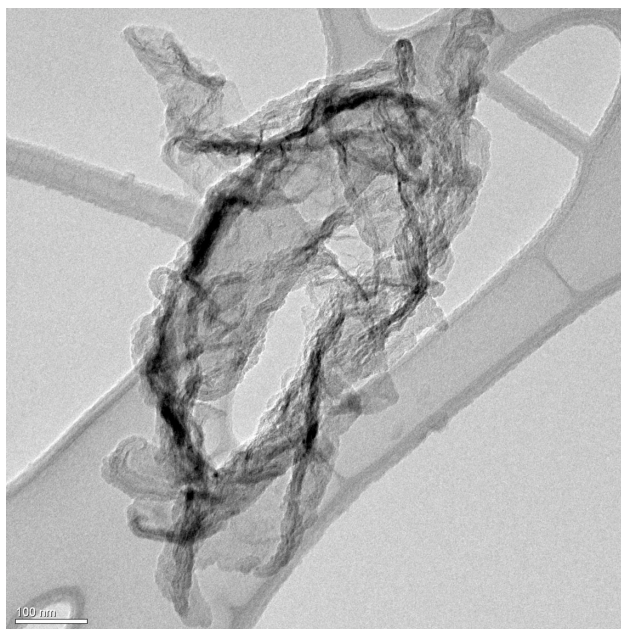

Supplementary Figure 1: TEM micrograph of the prepared GO showing its microsheet morphology.

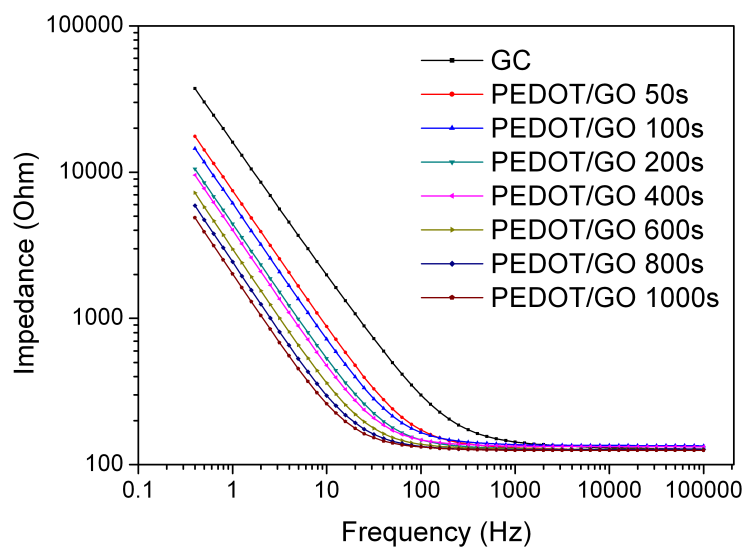

Supplementary Figure 2: Electrochemical impedance spectroscopy comparison of glassy carbon electrodes without and with PEDOT/GO coatings of different electrodeposition times. Longer deposition times result in decreased impedance values.
